# Supplementary material for: Effects of Photoperiod on Survival, Growth, Physiological, and Biochemical Indices of Redclaw Crayfish (Cherax quadricarinatus) Juveniles
Source: MDPI journal article supplement (doi:10.3390/ani14030411), 2024-01-26

## Supplementary Material

**Figure S1.** Experimental water tank.

Front view

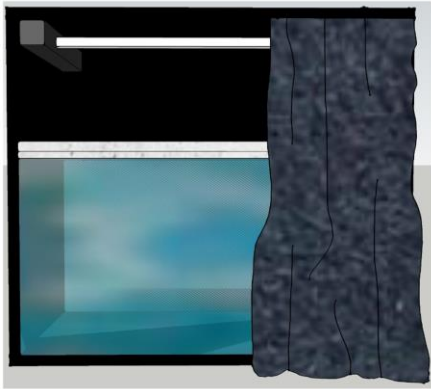

Top view

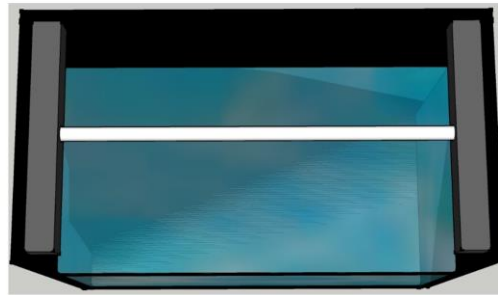

**Figure S2.** The red box represents the region for *C. quadricarinatus* color detection.

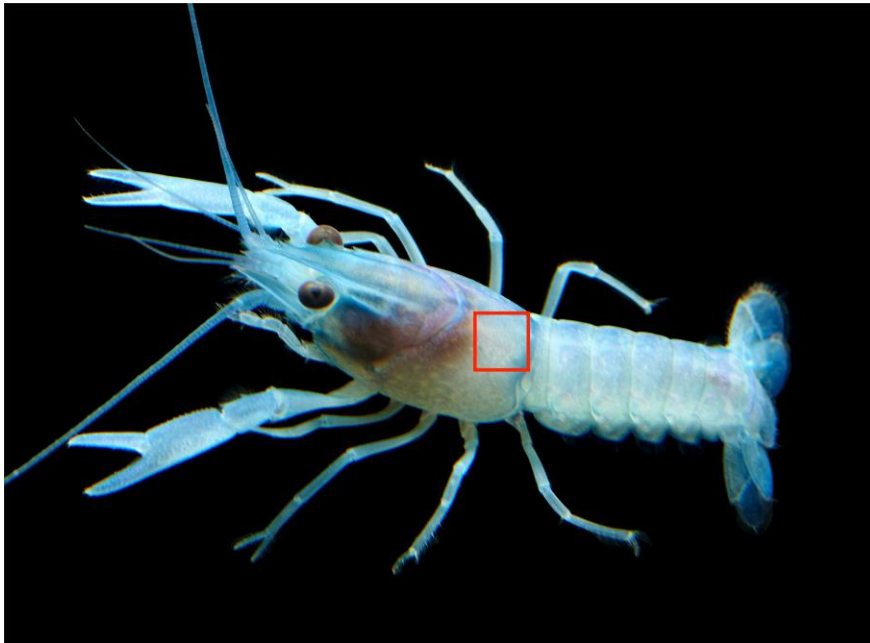

Supplement: s1 [file s1]
